# Supplementary material
Source: publisher site journal article supplement (https://www.dovepress.com/article/337900)
Supplement: Supplementary file 1 [file get_supplementary_file.php]

Appendix 1. Pediatric Pain Needs Assessment Survey Tool

| Question | Response Options |
| --- | --- |
| 1. What is the name of the site where you work or that you represent? | Free text response |
| 1. Do you provide direct patient care? | - Yes - No |
| 1. What is your role when you provide patient care? | - Nurse - Physician - Other (please specify) |
| 1. Are pain scales used in your emergency department? | - Yes - No - I don't know |
| 1. Which type of pain scales are used in your ED?  Check all that apply. | - Pain scale with pictures of faces - Pain scale with printed numbers - Verbal numeric scale (0-10) - Other (please specify) |
| 1. Where are printed pain scales used in your ED? | - At triage - In patient rooms - Other (please specify) |
| 1. Which of the following pain medications are available in your ED? | - Topical anesthetic cream -   (eg. EMLA, Ametop, Maxilene)   - Vapocoolant Spray (e.g. Pain Ease) - Sucrose drops for infants - Acetaminophen or ibuprofen - Ketorolac - Morphine oral liquid - Morphine IV formulation - Atomizer for intranasal medications - Fentanyl - Midazolam - Hydromorphone - Hydrocodone - Ketamine - Ketorolac - Nitrous Oxide (e.g. Entonox) - Other (please specify) |
| 1. Which of the following comfort measures are available in your ED? | - Cold packs - Splints - Toys or books for distraction - Electronic device/tablet for distraction (not including those owned by patient/parent or staff) - Device to play music - Television in treatment areas - Other (please specify) |
| 1. During which procedures are parents or guardians generally allowed to remain with their child?  Check all that apply. | - Needle procedures such as drawing blood or starting an IV - Urinary catheterization - Lumbar puncture while awake - Laceration repair while awake - Fracture reduction while awake |
| 1. When a child in your ED requires suturing, how often do they receive topical anesthetic (e.g. lidocaine-adrenaline-tetracaine/LAT) before any needles? | - Most of the time - About half of the time - Not very often - Never - I don't know - Other (please specify) |
| 1. When a child age 0-12 years requires bloodwork or an IV, how often do they receive a topical anesthetic before the needle? | - Most of the time - About half of the time - Not very often - Never - I don't know - Other (please specify) |
| 1. When a child age 0-12 years requires a needle procedure, how often are they encouraged to use a comfort position (e.g. sitting up or in a parent's lap) while they undergo the procedure? | - Most of the time - About half of the time - Not very often - Never - I don't know - Other (please specify) |
| 1. When a child age 0-6 years requires a needle procedure, how often are they restrained by staff or parents while lying on the bed? | - Most of the time - About half of the time - Not very often - Never - I don't know - Other (please specify) |
| 1. Is pediatric pain management covered in orientation for new nursing staff at your site? | - Yes - No - I don't know |
| 1. Is pediatric pain management covered in nursing staff annual education? | - Yes - No - I don't know |
| 1. Do physicians at your site receive education in pediatric pain management? | - Yes - No - I don't know |
| 1. Do staff receive education in what to SAY to a child before, during, and after a procedure that may cause pain? | - Yes - No - I don't know |
| 1. Does your site have patient education materials available for managing children's pain? | - Yes - No - I don't know |
| 1. What are the biggest challenges at your site in managing children's pain? | Free text response |
| 1. What would make it easier for staff to manage children's pain at your site? | Free text response |
| 1. How well do you think children's pain is managed at your site? | Sliding scale 0-100 |
| 1. Do you have any comments you would like to share about managing children's pain at your site? | Free text response |
